# Supplementary material for: Temporal and spatial trends in marine carbon isotopes in the Arctic Ocean and implications for food web studies
Source: PubMed Central journal article supplement (PMC6899536; doi:10.1111/gcb.14832), 2019-10-10
Supplement: GCB-25-4116-s002.pdf [file GCB-25-4116-s002.pdf]

**S2:** Relevant p-values from the post hoc Tukey comparison tests following one-way ANOVA1: spatial comparison between  $\delta^{13}\text{C-POC}_{\text{water}}$  data from arctic shelves and arctic basins; one-way ANOVA2: spatial comparison between  $\delta^{13}\text{C-POC}_{\text{water}}$  data from arctic shelves and arctic rivers; one-way ANOVA3: spatial comparison between  $\delta^{13}\text{C-POC}_{\text{water}}$  data from arctic shelves; one-way ANOVA4: spatial comparison of the  $\delta^{13}\text{C-POC}_{\text{ice}}$  data; two ways ANOVA5 including the factors “POC origin” (ice *versus* water) and “arctic region”: comparisons between  $\delta^{13}\text{C-POC}_{\text{ice}}$  with  $\delta^{13}\text{C-POC}_{\text{water}}$  for each arctic regions.

| ANOVA1 ( $\text{POC}_{\text{water}}$ )                             | Arctic basins           |                        |                     |              |                      |            |                 |              |                      |
|--------------------------------------------------------------------|-------------------------|------------------------|---------------------|--------------|----------------------|------------|-----------------|--------------|----------------------|
| South Iceland                                                      | <0.005                  |                        |                     |              |                      |            |                 |              |                      |
| North water polynya                                                | <0.005                  |                        |                     |              |                      |            |                 |              |                      |
| Chukchi sea                                                        | <0.005                  |                        |                     |              |                      |            |                 |              |                      |
| Barents sea                                                        | <0.005                  |                        |                     |              |                      |            |                 |              |                      |
| Bering sea                                                         | <0.005                  |                        |                     |              |                      |            |                 |              |                      |
| Svalbard                                                           | <0.005                  |                        |                     |              |                      |            |                 |              |                      |
| Siberian coast                                                     | <0.005                  |                        |                     |              |                      |            |                 |              |                      |
| Hudson bay                                                         | <0.005                  |                        |                     |              |                      |            |                 |              |                      |
| Svalbard fjords                                                    | 0.045                   |                        |                     |              |                      |            |                 |              |                      |
| Beaufort sea                                                       | <0.005                  |                        |                     |              |                      |            |                 |              |                      |
| Canadian archipelago                                               | <0.005                  |                        |                     |              |                      |            |                 |              |                      |
| ANOVA2 ( $\text{POC}_{\text{water}}$ ; $\text{POC}_{\text{riv}}$ ) | Siberian rivers         | North American rivers  |                     |              |                      |            |                 |              |                      |
| South Iceland                                                      | <0.005                  | <0.005                 |                     |              |                      |            |                 |              |                      |
| North water polynya                                                | <0.005                  | <0.005                 |                     |              |                      |            |                 |              |                      |
| Chukchi sea                                                        | <0.005                  | <0.005                 |                     |              |                      |            |                 |              |                      |
| Barents sea                                                        | <0.005                  | <0.005                 |                     |              |                      |            |                 |              |                      |
| Bering sea                                                         | <0.005                  | <0.005                 |                     |              |                      |            |                 |              |                      |
| Svalbard                                                           | <0.005                  | <0.005                 |                     |              |                      |            |                 |              |                      |
| Siberian coast                                                     | <0.005                  | <0.005                 |                     |              |                      |            |                 |              |                      |
| Hudson bay                                                         | <0.005                  | <0.005                 |                     |              |                      |            |                 |              |                      |
| Svalbard fjords                                                    | <0.005                  | <0.005                 |                     |              |                      |            |                 |              |                      |
| Beaufort sea                                                       | <0.005                  | <0.005                 |                     |              |                      |            |                 |              |                      |
| Canadian archipelago                                               | <0.005                  | <0.005                 |                     |              |                      |            |                 |              |                      |
| ANOVA3 ( $\text{POC}_{\text{water}}$ )                             | Chukchi sea             | Barents sea            | Bering sea          | Svalbard     | Siberian coast       | Hudson bay | Svalbard fjords | Beaufort sea | Canadian archipelago |
| North water polynya                                                | 0.999                   | 0.420                  | <0.005              | <0.005       | 0.084                | <0.005     | <0.005          | <0.005       | <0.005               |
| Chukchi sea                                                        | -                       | 0.618                  | <0.005              | <0.005       | 0.149                | <0.005     | <0.005          | <0.005       | <0.005               |
| Barents sea                                                        | -                       | -                      | 0.999               | 0.518        | 0.989                | 0.792      | 0.011           | <0.005       | 0.007                |
| Bering sea                                                         | -                       | -                      | -                   | 0.383        | 0.999                | 0.798      | <0.005          | <0.005       | <0.005               |
| Svalbard                                                           | -                       | -                      | -                   | -            | 0.999                | 0.999      | 0.586           | <0.005       | 0.651                |
| Siberian coast                                                     | -                       | -                      | -                   | -            | -                    | 0.999      | 0.495           | 0.019        | 0.584                |
| Hudson bay                                                         | -                       | -                      | -                   | -            | -                    | -          | 0.343           | <0.005       | 0.358                |
| Svalbard fjords                                                    | -                       | -                      | -                   | -            | -                    | -          | -               | 0.976        | 0.999                |
| Beaufort sea                                                       | -                       | -                      | -                   | -            | -                    | -          | -               | -            | 0.557                |
| ANOVA4 ( $\text{POC}_{\text{ice}}$ )                               | Svalbard                | Amundsen-Nansen basins | North water polynya | Beaufort sea | Canadian archipelago |            |                 |              |                      |
| Barents sea                                                        | 0.484                   | 0.006                  | 1.000               | <0.005       | 0.999                |            |                 |              |                      |
| Svalbard                                                           | -                       | 0.789                  | 0.352               | 0.071        | 0.381                |            |                 |              |                      |
| Amundsen-Nansen basins                                             | -                       | -                      | <0.005              | 0.519        | 0.006                |            |                 |              |                      |
| North water polynya                                                | -                       | -                      | -                   | <0.005       | 0.999                |            |                 |              |                      |
| Beaufort Sea                                                       | -                       | -                      | -                   | -            | <0.005               |            |                 |              |                      |
| ANOVA5                                                             | Water <i>versus</i> ice |                        |                     |              |                      |            |                 |              |                      |
| Barents sea                                                        | 0.134                   |                        |                     |              |                      |            |                 |              |                      |
| Svalbard                                                           | 0.527                   |                        |                     |              |                      |            |                 |              |                      |
| Amundsen-Nansen basins                                             | <0.005                  |                        |                     |              |                      |            |                 |              |                      |
| North water polynya                                                | 0.999                   |                        |                     |              |                      |            |                 |              |                      |
| Beaufort sea                                                       | 0.999                   |                        |                     |              |                      |            |                 |              |                      |
| Canadian archipelago                                               | <0.005                  |                        |                     |              |                      |            |                 |              |                      |
