# Supplementary material for: Temporal and spatial trends in marine carbon isotopes in the Arctic Ocean and implications for food web studies
Source: PubMed Central journal article supplement (PMC6899536; doi:10.1111/gcb.14832), 2019-10-10
Supplement: GCB-25-4116-s003.pdf [file GCB-25-4116-s003.pdf]

**S3:** Slopes, intercepts, and statistics of the decadal linear models of  $\delta^{13}\text{C}$  in ocean dissolved  $\text{CO}_2$ , dissolved inorganic carbon (DIC),  $\text{POC}_{\text{water}}$ ,  $\text{POC}_{\text{ice}}$  and arctic marine mammal tissues; DF = degrees of freedom; Lines in bold are considered significant ( $p < 0.005$ ).

|                                                      | Slope         |               |                  | Intercept    |              |                  | Linear model       |                    |
|------------------------------------------------------|---------------|---------------|------------------|--------------|--------------|------------------|--------------------|--------------------|
|                                                      | slope         | SD            | p-value          | Intercept    | SD           | p-value          | R <sup>2</sup> (%) | F-statistic (DF)   |
| <b>POC<sub>water</sub></b>                           |               |               |                  |              |              |                  |                    |                    |
| <b>Beaufort sea</b>                                  | <b>-0.117</b> | <b>-0.033</b> | <b>&lt;0.005</b> | <b>207.7</b> | <b>67.1</b>  | <b>&lt;0.005</b> | <b>21.1</b>        | <b>12.22 (41)</b>  |
| European Arctic                                      | -0.499        | 0.265         | 0.076            | 974.2        | 530.7        | 0.08             | 42.9               | 3.5 (18)           |
| <b>Arctic basins</b>                                 | <b>-0.256</b> | <b>-0.057</b> | <b>&lt;0.005</b> | <b>486.4</b> | <b>114.3</b> | <b>&lt;0.005</b> | <b>19.2</b>        | <b>20.2 (85)</b>   |
| Bering sea                                           | -0.019        | 0.046         | 0.679            | 14.7         | 92.9         | 0.875            | 0.29               | 0.19 (60)          |
| Chukchi sea                                          | +0.008        | 0.071         | 0.906            | -39.6        | 141.9        | 0.782            | 0.85               | 0.01 (34)          |
| <b>All data</b>                                      | <b>-0.149</b> | <b>0.028</b>  | <b>&lt;0.005</b> | <b>273.0</b> | <b>55.2</b>  | <b>&lt;0.005</b> | <b>9.4</b>         | <b>29.3 (311)</b>  |
| <b>POC<sub>ice</sub></b>                             |               |               |                  |              |              |                  |                    |                    |
| All data                                             | -0.185        | 0.106         | 0.084            | 350.5        | 211.9        | 0.103            | 2.9                | 3.1 (69)           |
| <b>DIC</b>                                           |               |               |                  |              |              |                  |                    |                    |
| <b>All data</b>                                      | <b>-0.011</b> | <b>0.001</b>  | <b>&lt;0.005</b> | <b>22.8</b>  | <b>2.5</b>   | <b>&lt;0.005</b> | <b>5.1</b>         | <b>72.9 (1333)</b> |
| <b>CO<sub>2</sub></b>                                |               |               |                  |              |              |                  |                    |                    |
| <b>All data</b>                                      | <b>-0.011</b> | <b>0.002</b>  | <b>&lt;0.005</b> | <b>12.1</b>  | <b>4.9</b>   | <b>0.013</b>     | <b>1.5</b>         | <b>20 (1333)</b>   |
| <b>Marine mammals</b>                                |               |               |                  |              |              |                  |                    |                    |
| <b>Northern fur seal - Bering sea/Gulf of Alaska</b> | <b>-0.020</b> | <b>0.003</b>  | <b>&lt;0.005</b> | <b>23.9</b>  | <b>6.5</b>   | <b>&lt;0.005</b> | <b>49.2</b>        | <b>36.8 (38)</b>   |
| <b>Ringed seal - East Greenland</b>                  | <b>-0.046</b> | <b>0.012</b>  | <b>&lt;0.005</b> | <b>74.7</b>  | <b>23.4</b>  | <b>&lt;0.005</b> | <b>31.3</b>        | <b>15.5 (34)</b>   |
| <b>Beluga whale -Hudson Bay</b>                      | <b>-0.026</b> | <b>0.003</b>  | <b>&lt;0.005</b> | <b>36.6</b>  | <b>6.7</b>   | <b>&lt;0.005</b> | <b>57.9</b>        | <b>60.1 (38)</b>   |
| <b>Beluga whale - Baffin Bay</b>                     | <b>-0.021</b> | <b>0.006</b>  | <b>&lt;0.005</b> | <b>25.7</b>  | <b>11.8</b>  | <b>0.040</b>     | <b>30.8</b>        | <b>12 (24)</b>     |
| <b>Bowhead whale - Bering sea/Chukchi sea</b>        | <b>-0.064</b> | <b>0.007</b>  | <b>&lt;0.005</b> | <b>104.2</b> | <b>13.6</b>  | <b>&lt;0.005</b> | <b>72.3</b>        | <b>80.7 (32)</b>   |
